# Supplementary material for: Structural plasticity of the N-terminal capping helix of the TPR domain of kinesin light chain
Source: PubMed Central journal article supplement (PMC5642895; doi:10.1371/journal.pone.0186354), 2017-10-16

**A****N-terminal part (TPR1/2/3/4)**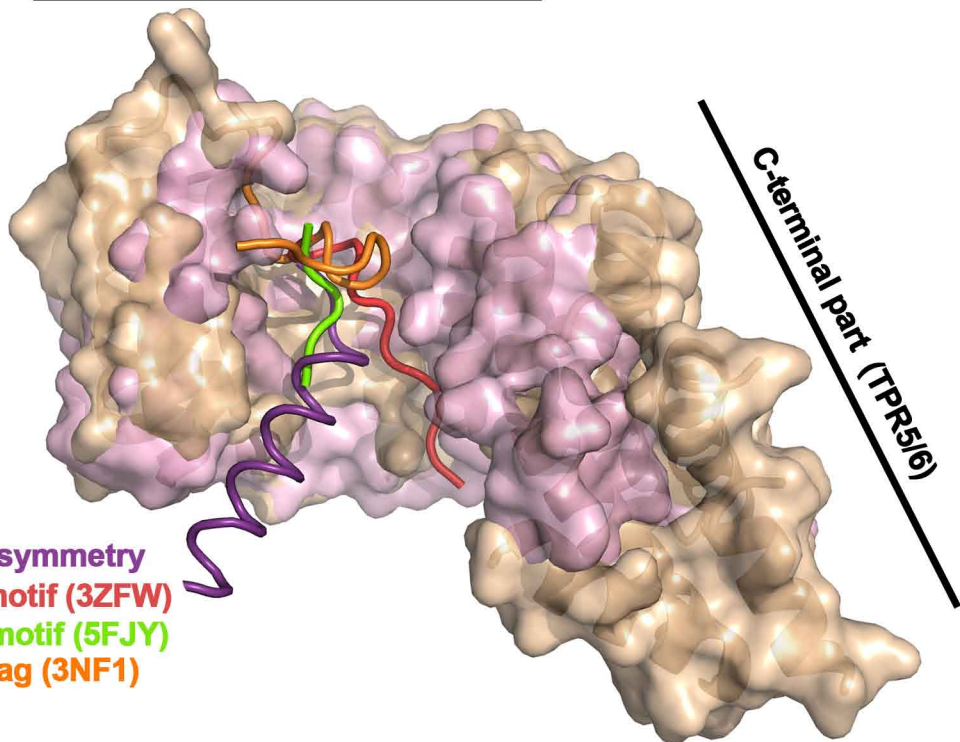**B**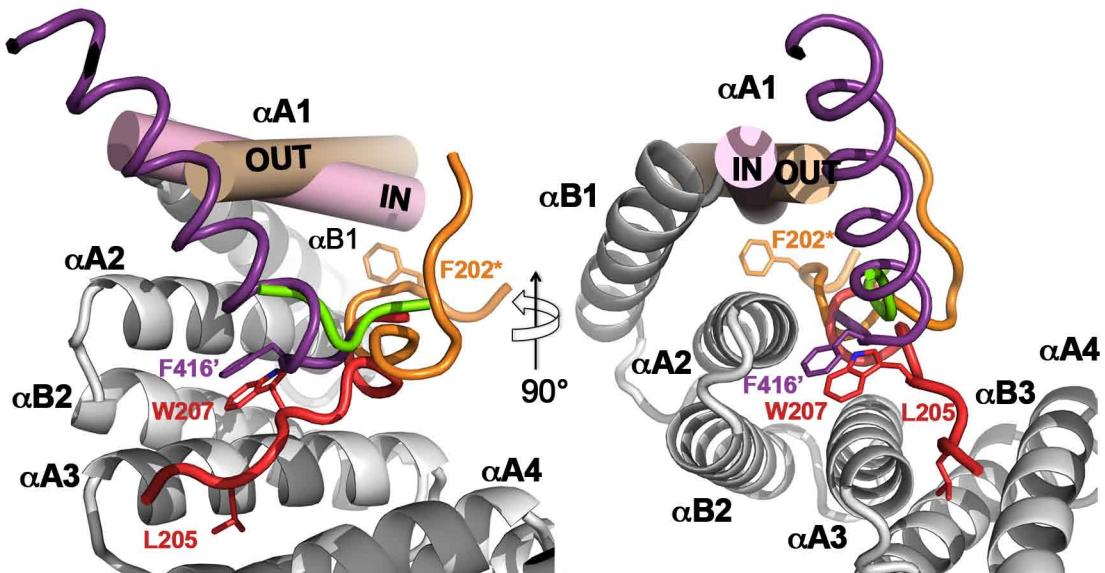

Supplement: pone.0186354.s003.pdf [file pone.0186354.s003.pdf]
