# Supplementary material for: Structural plasticity of the N-terminal capping helix of the TPR domain of kinesin light chain
Source: PubMed Central journal article supplement (PMC5642895; doi:10.1371/journal.pone.0186354), 2017-10-16
Supplement: pone.0186354.s004.pdf [file pone.0186354.s004.pdf]

A

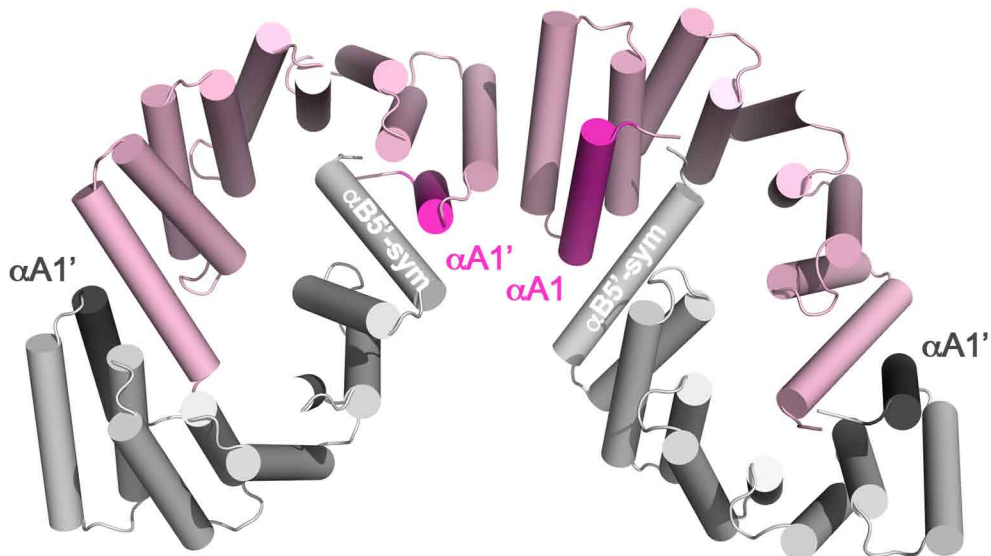

**KLC1-TPR** <sup>[A1-B5]</sup>

B

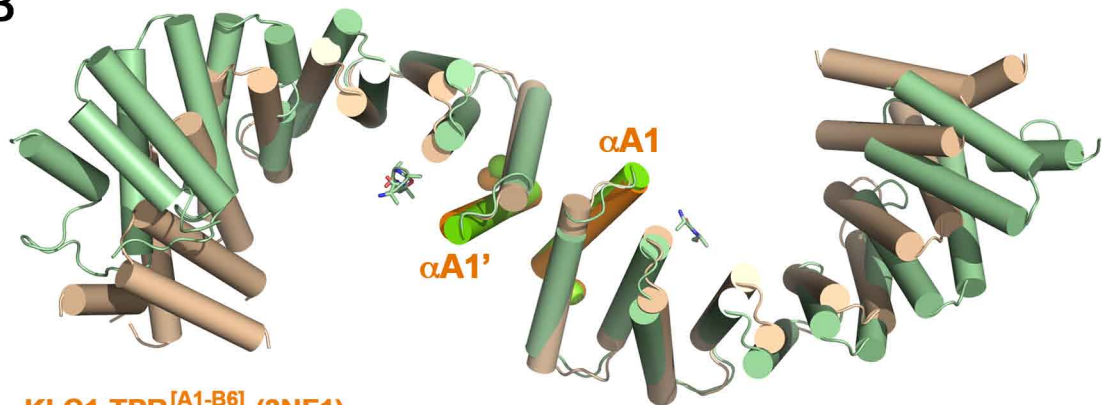

**KLC1-TPR** <sup>[A1-B6]</sup> (3NF1)

**KLC2-LFP-TPR** <sup>[A1-B6]</sup> (5FJY)
